# Supplementary material for: High thermoelectric performance of rapidly microwave-synthesized Sn1−δS
Source: Royal Society of Chemistry journal article supplement (doi:10.1039/d0ma00301h), 2020-01-01
Supplement: d0ma00301h1.pdf [file d0ma00301h1.pdf]

## ELECTRONIC SUPPLEMENTARY INFORMATION FOR

### **High thermoelectric performance of rapidly microwave-synthesized $\text{Sn}_{1-\delta}\text{S}$**

Jesús Prado-Gonjal,<sup>a,b\*</sup> Javier Gainza,<sup>b</sup> Isabel Aguayo,<sup>a</sup> Óscar Juan Durá,<sup>c</sup> Sara Rodríguez-Pérez,<sup>a</sup> Federico Serrano-Sánchez,<sup>b</sup> Norbert M. Nemes,<sup>d</sup> María Teresa Fernández-Díaz,<sup>e</sup> José Antonio Alonso,<sup>b</sup> Emilio Morán<sup>a</sup>

<sup>a</sup> Departamento de Química Inorgánica, Universidad Complutense de Madrid, E-28040 Madrid, Spain

<sup>b</sup> Instituto de Ciencia de Materiales de Madrid (ICMM), Consejo Superior de Investigaciones Científicas (CSIC), Sor Juana Inés de la Cruz 3, E-28049, Madrid, Spain

<sup>c</sup> Departamento de Física Aplicada, Universidad de Castilla-La Mancha, Ciudad Real, E-13071, Spain

<sup>d</sup> Departamento de Física de Materiales, Universidad Complutense de Madrid, E-28040 Madrid, Spain

<sup>e</sup> Institute Laue Langevin, BP 156X, Grenoble, F-38042, France

\* corresponding author: [jpradogo@ucm.es](mailto:jpradogo@ucm.es)

## Pisarenko line and Lorenz number

Assuming that the dominant mechanism of charge carrier scattering is by acoustic phonons, one obtains the following equations for Seebeck coefficient and carrier density [1]:

$$S = \frac{k_B}{e} \left[ \frac{2F_1(\eta)}{F_0(\eta)} - \eta \right] \quad (1)$$

$$n = 4\pi \left( \frac{2m^*k_B T}{h^2} \right)^{3/2} F_{1/2}(\eta) \quad (2)$$

Where  $k_B$  is the Boltzmann's constant,  $e$  is the elementary charge,  $T$  is the absolute temperature,  $m^*$  is the effective mass,  $h$  is the Planck constant,  $\eta$  is the reduced Fermi energy (electrochemical potential), and  $F_j(\eta)$  is the Fermi integral:

$$F_j(\eta) = \int_0^\infty \frac{\epsilon^j d\epsilon}{1 + \exp(\epsilon - \eta)} \quad (3)$$

Theoretical curves are generated by calculating  $S$  versus  $\eta$ , and  $n$  versus  $\eta$ . From that data, the Pisarenko relation,  $S$  versus  $n$ , can be represented.

The total thermal conductivity ( $\kappa$ ) is the sum of electronic thermal conductivity ( $\kappa_e$ ) and lattice thermal conductivity ( $\kappa_l$ ), and can be written in this way:

$$\kappa_l = \kappa - \kappa_e = \kappa - L\sigma T$$

Where  $L$  is the Lorenz number,  $\sigma$  is the electrical conductivity and  $T$  is the absolute temperature.

Finally, the Lorenz number can be calculated using the expression:

$$L = \frac{k_B^2}{e^2} \frac{3F_0(\eta)F_2(\eta) - 4F_1(\eta)^2}{F_0(\eta)^2}$$

## Modeling of lattice thermal conductivity

In 1959, J. Callaway proposed a phenomenological model about the lattice thermal conductivity [2], which can be expressed as:

$$\kappa_l = \frac{k_B}{2\pi^2\nu} \left(\frac{k_B T}{\hbar}\right)^3 \int_0^{\Theta_D/T} \frac{x^4 e^x}{\tau^{-1}(e^x - 1)^2} dx \quad (4)$$

Where  $x = \hbar\omega/k_B T$  is the reduced phonon frequency,  $k_B$  is the Boltzmann constant,  $\hbar$  is the reduced Planck constant,  $\Theta_D$  is the Debye temperature,  $\nu$  is the sound velocity, and  $\tau$  is the effective relaxation time. In this work,  $\tau$  is expressed as follows [3]:

$$\tau^{-1} = A\omega^4 + B\omega^2 T e^{-\Theta_D/3T} + \frac{\nu}{d} + C\omega^2 \quad (5)$$

Where  $d$  is the grain size and  $\nu/d$  represents boundary scattering.  $A$  is the pre-factor of point defect scattering relaxation time,  $B$  is the prefactor of phonon-phonon Umklapp scattering relaxation time, and  $C$  is the prefactor of electron-phonon scattering relaxation time. Some of these parameters can be found in literature [4], and the rest of them can be obtained through fitting the prediction result to the experimental lattice thermal conductivity values.

**Table S1** - The parameters used for calculation of the lattice thermal conductivity prediction of SnS sample.

| Parameter                                       | Value |
|-------------------------------------------------|-------|
| $A$ ( $10^{-42}$ s <sup>3</sup> )               | 1.88  |
| $B$ ( $10^{-17}$ s/K)                           | 3.57  |
| Debye temperature $\Theta_D$ (K)                | 270   |
| Sound velocity $\nu$ (m/s)                      | 2424  |
| Average grain size $\Theta_D$ ( $\mu\text{m}$ ) | 10    |
| $C$ ( $10^{-16}$ s)                             | 2     |

## References

- [1] A.F. May, G.J. Snyder, Introduction to Modeling Thermoelectric Transport at High Temperatures, in: D.M. Rowe (Ed.), Mater. Prep. Charact. Thermoelectr., CRC Press, 2012: pp. 1–18. <https://doi.org/doi:10.1201/b11891-13>.
- [2] J. Callaway, Model for lattice thermal conductivity at low temperatures, Phys. Rev. 113 (1959) 1046–1051. <https://doi.org/10.1103/PhysRev.113.1046>.
- [3] J. Yu, C. Fu, Y. Liu, K. Xia, U. Aydemir, T.C. Chasapis, G.J. Snyder, X. Zhao, T. Zhu, Unique Role of Refractory Ta Alloying in Enhancing the Figure of Merit of NbFeSb Thermoelectric Materials, Adv. Energy Mater. 8 (2018) 1–8. <https://doi.org/10.1002/aenm.201701313>.
- [4] Asfandiyar, B. Cai, L.-D. Zhao, J.-F. Li, High thermoelectric figure of merit  $ZT > 1$  in SnS polycrystals, J. Mater. 6 (2020) 77–85. <https://doi.org/10.1016/j.jmat.2019.12.003>.
